# Supplementary material for: Potential impact of encounter patient decision aids on the patient–clinician dialogue: a qualitative study on Dutch and American medical specialists’ experiences
Source: HighWire-hosted journal article supplement (doi:10.1136/bmjopen-2020-048146), 2022-02-01
Supplement: bmjopen-2020-048146supp003_data_supplement.pdf [file bmjopen-2020-048146supp003_data_supplement.pdf]

### Supplementary file 3. Interview guide: providers' perspectives on using Option Grids decision aids

#### Experiences with Option Grids so far

1. Just thinking about the patient visits in which you used the Option Grid: What was your experience like?
  - Probe: How did patients respond to it?
  - Probe: Was the conversation different?
2. Did the Option Grid change the conversation between you and the patient?
  - If so, what changed?
3. Did it hinder or help the process of decision-making?
  - Probe: If yes, did it help you? And how?
  - Probe: If yes, do you think it helps the patient? And how?
  - Probe: If no, why did it hinder the decision-making process?
4. Did things change over time?
  - Probe: Your behavior / your counseling strategies / way of communicating / ....
  - Probe: Did you notice any change in how you used the Grid? (learning curve)
5. Is there anything we could change/improve about the Grid?
  - Probe: Did you feel comfortable with the content?
  - Probe: Is it easy to explain to patients?

#### Focus on how it fits into workflow or routine care

6. Do you see this working in routine care?
  - Probe: If so, how? (organizational aspect of routine care)
  - Does it fit in the current workflow?
  - If yes, why?
  - If not, what is the reason - you think- currently stopping you from using it in routine care?
7. Do you think other clinicians could use it (e.g. nurse, midwife)?
  - Probe: Do you think they should?
  - Probe: Would it benefit them too?
  - Probe: Do you think it is the work of the doctor to use the Option Grid?
8. How would you prefer to use it? \*
  - Probe: Could this be influenced by the patient you are seeing (e.g. literacy, actual patients' preferences for using the tool)?
  - Probe: Do you think this might also depend on the clinical area and decision at stake?
9. How do you think patients prefer using it?
  - Probe: Do you give them a choice when introducing the Option Grid (e.g. reading it together; on their own, in the waiting room)?
10. Is it most helpful for patients before, during or after their visit?
  - Probe: What exactly do you think is most helpful to them?
  - Probe: What was most helpful to you, if anything?
